# Supplementary material for: Environmental and Food Safety Assessment of Pre-Harvest Activities in Local Small-Scale Fruit and Vegetable Farms in Northwest Portugal: Hazard Identification and Compliance with Good Agricultural Practices (GAPs)
Source: MDPI journal article supplement (doi:10.3390/foods14122129), 2025-06-18
Supplement: s1 [file foods-3624565-supplementary.pdf › foods-3624565-supplementary.pdf]

## Supplementary material

**Table S1**

Analytical performance of the applied methodology for the analysis of agrochemicals in all the samples.

| Family group | Active compound                                                     | Linearity (R <sup>2</sup> ) | RSD (%) | LOD (µg/L) | LOQ (µg/L) | LOD (µg/kg) | LOQ (µg/kg) |
|--------------|---------------------------------------------------------------------|-----------------------------|---------|------------|------------|-------------|-------------|
| OCPs         | α-hexachlorocyclohexanes (α-HCH)                                    | 0.9983                      | 4.7     | 5.76       | 19.19      | 0.17        | 0.58        |
|              | β-hexachlorocyclohexanes (β-HCH)                                    | 0.9960                      | 8.6     | 11.47      | 38.22      | 0.53        | 1.76        |
|              | Hexachlorobenzene (HCB)                                             | 0.9993                      | 4.1     | 9.77       | 32.56      | 0.29        | 0.98        |
|              | [1,1,1 trichloro-2,2-bis- (p-chlorophenyl) ethane] (o,p'-DDT)       | 0.9964                      | 7.0     | 14.51      | 48.35      | 0.44        | 1.45        |
|              | [2,2-bis(p-chlorophenyl)-1,1-dichloroethylene] (p,p'-DDE)           | 0.9961                      | 7.1     | 9.17       | 30.57      | 0.49        | 1.64        |
|              | 1-chloro-4-[2,2-dichloro-1-(4-chlorophenyl)ethyl]benzene (p,p'-DDD) | 0.9999                      | 2.8     | 5.27       | 17.56      | 0.16        | 0.53        |
|              | Aldrin                                                              | 0.9950                      | 8.4     | 20.32      | 67.73      | 0.63        | 2.09        |
|              | Dieldrin                                                            | 0.9994                      | 3.7     | 8.63       | 28.77      | 0.26        | 0.86        |
|              | Endosulfan I                                                        | 0.9991                      | 4.6     | 10.90      | 36.34      | 0.33        | 1.09        |
| OPPs         | Chlorfenvinphos                                                     | 0.9993                      | 5.6     | 7.38       | 24.59      | 0.22        | 0.74        |
|              | Chlorpyrifos                                                        | 1.0000                      | 0.9     | 1.19       | 3.96       | 0.04        | 0.12        |
|              | Chlorpyrifos-methyl                                                 | 0.9998                      | 2.8     | 3.66       | 12.21      | 0.11        | 0.37        |
|              | Malathion                                                           | 0.9965                      | 9.5     | 15.65      | 52.16      | 0.47        | 1.56        |
|              | Dimethoate                                                          | 0.9996                      | 4.3     | 5.62       | 18.75      | 0.17        | 0.56        |
| Pyrethroids  | Bifentrin                                                           | 0.9988                      | 5.1     | 9.18       | 30.59      | 0.28        | 0.92        |
|              | Cyhalothrin I                                                       | 0.9966                      | 5.0     | 11.28      | 37.59      | 0.34        | 1.13        |
|              | Cyhalothrin II                                                      | 0.9987                      | 5.8     | 11.59      | 38.64      | 0.35        | 1.16        |
|              | Cypermethrin                                                        | 0.9958                      | 6.6     | 15.23      | 50.77      | 0.46        | 1.52        |

|                 |        |     |       |       |      |      |
|-----------------|--------|-----|-------|-------|------|------|
| Deltamethrin I  | 0.9986 | 3.8 | 8.74  | 29.13 | 0.26 | 0.87 |
| Deltamethrin II | 0.9979 | 4.6 | 10.74 | 35.81 | 0.32 | 1.07 |
| Fenvalerate I   | 0.9956 | 7.9 | 19.61 | 65.36 | 0.59 | 1.96 |
| Fenvalerate II  | 0.9986 | 5.6 | 13.16 | 43.85 | 0.39 | 1.32 |

**Table S2**

Analytical performance of the applied methodology for the analysis of flame retardants and PCBs in all the samples.

| Compound group                         | Compound                                            | Linearity (R <sup>2</sup> ) | RSD (%) | LOD (µg/L) | LOQ (µg/L) | LOD (µg/kg) | LOQ (µg/kg) |
|----------------------------------------|-----------------------------------------------------|-----------------------------|---------|------------|------------|-------------|-------------|
| Polybrominated diphenyl ethers (PBDEs) | 2,4,4'-tribromodiphenyl ether (BDE 28)              | 0.9984                      | 9.5     | 18.07      | 60.23      | 0.54        | 1.81        |
|                                        | 2,2',4,4'-Tetrabromodiphenyl ether (BDE 47)         | 0.9991                      | 3.4     | 7.00       | 23.32      | 0.21        | 0.70        |
|                                        | 2,2',4,4',5-Pentabromodiphenyl ether (BDE 99)       | 0.9990                      | 4.8     | 11.42      | 38.07      | 0.34        | 1.14        |
|                                        | 2,2',4,4',6'-Hexabromodiphenyl ether (BDE 100)      | 0.9982                      | 6.4     | 15.01      | 50.04      | 0.45        | 1.50        |
|                                        | 2,2',4,4',5,5'-Hexabromodiphenyl ether (BDE 153)    | 0.9954                      | 7.4     | 11.75      | 39.17      | 0.35        | 1.18        |
|                                        | 2,2',4,4',5,6'-hexabromodiphenyl ether (BDE154)     | 0.9973                      | 5.3     | 12.16      | 40.55      | 0.36        | 1.22        |
|                                        | 2,2',3,4,4',5',6-Heptabromodiphenyl ether (BDE 183) | 0.9975                      | 5.4     | 8.59       | 28.64      | 0.26        | 0.86        |
| Polychlorinated biphenyls (PCBs)       | 2,4,4'-Trichlorobiphenyl (PCB 28)                   | 0.9951                      | 8.0     | 18.53      | 61.78      | 0.56        | 1.85        |
|                                        | 2,3',4,4',5-Pentachlorobiphenyl (PCB 118)           | 0.9963                      | 9.2     | 21.74      | 72.47      | 0.65        | 2.17        |
|                                        | 2,2',4,4',5,5'-Hexachlorobiphenyl (PCB 153)         | 0.9954                      | 6.3     | 19.00      | 63.33      | 0.57        | 1.90        |
|                                        | 2,2',3,4,4',5,5'-Heptachlorobiphenyl (PCB 180)      | 0.9961                      | 9.0     | 17.84      | 59.46      | 0.54        | 1.78        |
|                                        | Tris (2-butoxyethyl) phosphate (TBEP)               | 0.9971                      | 11.6    | 15.24      | 50.79      | 0.46        | 1.52        |
| Phosphorus flame retardants (PFRs)     | Tris(2-chloroethyl) phosphate (TCEP)                | 0.9992                      | 4.7     | 6.36       | 21.18      | 0.19        | 0.64        |
|                                        | Tri-cresyl phosphate I isomer (TCP I)               | 0.9985                      | 5.5     | 8.91       | 29.71      | 0.27        | 0.89        |
|                                        | Tri-cresyl phosphate II isomer (TCP II)             | 0.9979                      | 8.36    | 12.53      | 41.78      | 0.38        | 1.25        |

|                                           |        |       |       |       |      |      |
|-------------------------------------------|--------|-------|-------|-------|------|------|
| Tri-cresyl phosphate III isomer (TCP III) | 0.9953 | 11.83 | 15.97 | 53.24 | 0.48 | 1.60 |
| Tris(2-ethylhexyl) phosphate (TEHP)       | 0.9990 | 5.3   | 7.16  | 23.87 | 0.21 | 0.72 |
| Tri-iso-butyl phosphate (TiBP)            | 0.9957 | 6.8   | 10.20 | 34.01 | 0.46 | 1.52 |
| Tri-n-butyl phosphate (TnBP)              | 0.9996 | 3.3   | 4.40  | 14.67 | 0.13 | 0.44 |
| Triphenyl phosphate (TPhP)                | 0.9997 | 1.8   | 3.64  | 12.13 | 0.11 | 0.36 |
| Tripropyl phosphate (TPrP)                | 0.9971 | 6.8   | 16.96 | 56.52 | 0.51 | 1.70 |

**Table S3**

Analytical performance of the applied methodology for the analysis of nitrate in all the samples.

| Linearity (R <sup>2</sup> ) | RSD (%) | LOD (mg/L) | LOQ (mg/L) | Sample | LOD (mg/kg) | LOQ (mg/kg) |
|-----------------------------|---------|------------|------------|--------|-------------|-------------|
| 0.9999                      | 0.79    | 0.39       | 1.30       | Food   | 2.59        | 8.62        |
|                             |         |            |            | Soil   | 12.94       | 43.12       |

**Table S4**

Analytical performance of the applied methodology for the analysis of heavy metals in food samples.

| Type of sample                         | Farmer ID | Heavy metals (mg/kg fresh weight for food) |       |       |       |       |       |       |       |       |       |       |       |       |       |
|----------------------------------------|-----------|--------------------------------------------|-------|-------|-------|-------|-------|-------|-------|-------|-------|-------|-------|-------|-------|
|                                        |           | Zn                                         |       | Cd    |       | Pb    |       | Ni    |       | Cu    |       | Cr    |       | Hg    |       |
|                                        |           | LOD                                        | LOQ   | LOD   | LOQ   | LOD   | LOQ   | LOD   | LOQ   | LOD   | LOQ   | LOD   | LOQ   | LOD   | LOQ   |
| Apple ( <i>Malus domestica</i> )       | BB        | 1.138                                      | 3.793 | 0.006 | 0.020 | 0.035 | 0.117 | 0.017 | 0.055 | 0.167 | 0.557 | 0.431 | 1.438 | 0.010 | 0.031 |
|                                        | GP        | 1.655                                      | 5.518 | 0.009 | 0.029 | 0.051 | 0.170 | 0.024 | 0.080 | 0.243 | 0.811 | 0.627 | 2.091 | 0.015 | 0.046 |
| Bell pepper ( <i>Capsicum annuum</i> ) | CB        | 0.005                                      | 0.015 | 0.027 | 0.089 | 0.871 | 2.905 | 0.013 | 0.042 | 0.128 | 0.427 | 0.330 | 1.101 | 0.008 | 0.024 |
|                                        | EB        | 0.794                                      | 2.646 | 0.004 | 0.014 | 0.024 | 0.081 | 0.012 | 0.038 | 0.117 | 0.389 | 0.301 | 1.003 | 0.007 | 0.022 |

|                                               |    |       |       |       |       |       |       |       |       |       |       |       |       |       |       |
|-----------------------------------------------|----|-------|-------|-------|-------|-------|-------|-------|-------|-------|-------|-------|-------|-------|-------|
| Bok choy ( <i>Brassica rapa</i> )             | IP | 0.528 | 1.759 | 0.003 | 0.009 | 0.016 | 0.054 | 0.008 | 0.026 | 0.078 | 0.258 | 0.200 | 0.667 | 0.005 | 0.015 |
|                                               | JB | 0.444 | 1.479 | 0.002 | 0.008 | 0.014 | 0.045 | 0.006 | 0.021 | 0.065 | 0.217 | 0.168 | 0.561 | 0.004 | 0.012 |
|                                               | QB | 0.820 | 2.732 | 0.004 | 0.014 | 0.025 | 0.084 | 0.012 | 0.040 | 0.120 | 0.402 | 0.311 | 1.036 | 0.008 | 0.023 |
|                                               | KP | 0.902 | 3.007 | 0.005 | 0.016 | 0.028 | 0.092 | 0.013 | 0.044 | 0.133 | 0.442 | 0.342 | 1.140 | 0.008 | 0.025 |
| Carrots ( <i>Daucus carota</i> )              | LP | 0.006 | 0.022 | 0.038 | 0.127 | 1.237 | 4.125 | 0.018 | 0.060 | 0.182 | 0.606 | 0.469 | 1.563 | 0.011 | 0.034 |
| Chard for raw salads ( <i>Beta vulgaris</i> ) | OP | 1.030 | 3.435 | 0.005 | 0.018 | 0.032 | 0.106 | 0.015 | 0.050 | 0.151 | 0.505 | 0.391 | 1.302 | 0.009 | 0.028 |
| Cucumber ( <i>Cucumis sativus</i> )           | AB | 0.400 | 1.335 | 0.002 | 0.007 | 0.012 | 0.041 | 0.006 | 0.019 | 0.059 | 0.196 | 0.152 | 0.506 | 0.004 | 0.011 |
|                                               | FP | 0.605 | 2.017 | 0.003 | 0.011 | 0.019 | 0.062 | 0.009 | 0.029 | 0.089 | 0.296 | 0.229 | 0.765 | 0.006 | 0.017 |
|                                               | NP | 1.984 | 6.613 | 0.010 | 0.035 | 0.061 | 0.203 | 0.029 | 0.096 | 0.292 | 0.972 | 0.752 | 2.506 | 0.018 | 0.055 |
| Lettuce ( <i>Lactuca sativa</i> )             | HP | 0.005 | 0.018 | 0.032 | 0.106 | 1.034 | 3.446 | 0.015 | 0.050 | 0.152 | 0.506 | 0.392 | 1.306 | 0.009 | 0.028 |
| Tomato ( <i>Solanum lycopersicum</i> )        | DB | 0.767 | 2.558 | 0.004 | 0.013 | 0.024 | 0.079 | 0.011 | 0.037 | 0.113 | 0.376 | 0.291 | 0.969 | 0.007 | 0.021 |
|                                               | MP | 0.801 | 2.670 | 0.004 | 0.014 | 0.025 | 0.082 | 0.012 | 0.039 | 0.118 | 0.392 | 0.304 | 1.012 | 0.007 | 0.022 |
|                                               | PB | 0.576 | 1.920 | 0.003 | 0.010 | 0.018 | 0.059 | 0.008 | 0.028 | 0.085 | 0.282 | 0.218 | 0.728 | 0.005 | 0.016 |

**Table S5**

Analytical performance of the applied methodology for the analysis of heavy metals in soil and water.

|    | Linearity (R <sup>2</sup> ) | RSD (%) | LOD (mg/L) | LOQ (mg/L) | LOD (mg/kg dry weight) | LOQ (mg/kg dry weight) |
|----|-----------------------------|---------|------------|------------|------------------------|------------------------|
| Zn | 0.9998                      | 6.2     | 0.1090     | 0.3640     | 10.91                  | 36.37                  |
| Cd | 0.9990                      | 19.4    | 0.0006     | 0.0019     | 0.06                   | 0.19                   |
| Pb | 0.9990                      | 22.9    | 0.0034     | 0.0112     | 0.34                   | 1.12                   |
| Ni | 0.9992                      | 18.0    | 0.0016     | 0.0053     | 0.16                   | 0.54                   |
| Cu | 0.9999                      | 3.6     | 0.0160     | 0.0535     | 1.60                   | 5.35                   |

|    |        |     |        |        |      |       |
|----|--------|-----|--------|--------|------|-------|
| Cr | 0.9999 | 5.6 | 0.0414 | 0.1379 | 4.14 | 13.79 |
| Hg | 0.9990 | 2.9 | 0.0010 | 0.0030 | 0.10 | 0.30  |

**Table S6**

Microbiological assessment of the food. Enumeration results were expressed in [log (CFU/g)]. (ND means that the parameter was not detected in the sample).

| Type of food sample                    | Farmer ID | Microbiological parameters |                         |                  |                            |                                         |                      |                           |         |         |                                   |                                      |                                              |
|----------------------------------------|-----------|----------------------------|-------------------------|------------------|----------------------------|-----------------------------------------|----------------------|---------------------------|---------|---------|-----------------------------------|--------------------------------------|----------------------------------------------|
|                                        |           | <i>E. coli</i>             | <i>Listeria</i><br>spp. | <i>B. cereus</i> | <i>Pseudomonas</i><br>spp. | Coagulase-<br>positive<br>Staphylococci | <i>C.perfringens</i> | <i>Enterobacteriaceae</i> | Yeasts  | Molds   | Aerobic<br>mesophilic<br>bacteria | Detection of <i>L. monocytogenes</i> | Detection<br>of<br><i>Salmonella</i><br>spp. |
| Apple ( <i>Malus domestica</i> )       | BB        | <1.0                       | <2.3                    | 3.1±0.2          | 5.3±0.5                    | <2.3                                    | <1.0                 | <1.0                      | <2.0    | <2.0    | 4.5±0.1                           | ND                                   | ND                                           |
|                                        | GP        | <1.0                       | <2.3                    | <2.3             | <2.3                       | <2.3                                    | <1.0                 | <1.0                      | <2.0    | <2.0    | 2.2±0.0                           | ND                                   | ND                                           |
| Bell pepper ( <i>Capsicum annuum</i> ) | CB        | <1.0                       | <2.3                    | 2.6±0.1          | 3.6±0.1                    | <2.3                                    | <1.0                 | <1.0                      | <2.0    | 2.1±0.0 | 3.3±0.1                           | ND                                   | ND                                           |
|                                        | EB        | <1.0                       | <2.3                    | <2.3             | 3.9±0.3                    | <2.3                                    | <1.0                 | <1.0                      | <2.0    | <2.0    | 4.5±0.3                           | ND                                   | ND                                           |
|                                        | IP        | 2.2±0.1                    | 2.6±0.5                 | 4.6±0.0          | 5.7±0.2                    | <2.3                                    | <1.0                 | 3.6±0.0                   | 2.2±0.0 | 2.2±0.1 | 4.9±0.0                           | ND                                   | ND                                           |
|                                        | JB        | <1.0                       | <2.3                    | 3.7±0.5          | 5.9±0.1                    | <2.3                                    | <1.0                 | 4.2±0.1                   | 2.0±0.1 | <2.0    | >6.0                              | ND                                   | ND                                           |
|                                        | QB        | <1.0                       | <2.3                    | 2.6±0.3          | 2.6±0.4                    | <2.3                                    | <1.0                 | 3.2±0.3                   | <2.0    | <2.0    | 5.2±0.3                           | ND                                   | ND                                           |
| Bok choy ( <i>Brassica rapa</i> )      | KP        | <1.0                       | <2.3                    | 5.2±0.4          | 5.8±0.2                    | <2.3                                    | <1.0                 | 4.4±0.1                   | 2.5±0.0 | 2.1±0.0 | >6.0                              | ND                                   | ND                                           |
| Carrots ( <i>Daucus</i>                | LP        | <1.0                       | 4.3±0.1                 | 4.9±0.1          | 5.6±0.1                    | <2.3                                    | 1.8±0.1              | 3.5±0.0                   | <2.0    | <2.0    | >6.0                              | ND                                   | ND                                           |

|                                                      |    |         |         |          |         |         |         |         |         |         |         |    |    |
|------------------------------------------------------|----|---------|---------|----------|---------|---------|---------|---------|---------|---------|---------|----|----|
| <i>carota)</i>                                       |    |         |         |          |         |         |         |         |         |         |         |    |    |
| Chard for raw<br>salads ( <i>Beta<br/>vulgaris</i> ) | OP | <1.0    | <2.3    | 5.2±0.01 | 5.6±0.0 | <2.3    | 1.6±0.0 | 4.4±0.1 | 2.2±0.0 | <2.0    | >6.0    | ND | ND |
| Cucumber<br>( <i>Cucumis<br/>sativus</i> )           | AB | <1.0    | <2.3    | 3.2±0.2  | 4.8±0.5 | <2.3    | <1.0    | <1.0    | <2.0    | <2.0    | 4.4±0.0 | ND | ND |
|                                                      | FP | <1.0    | <2.3    | 2.9±0.3  | 4.9±0.4 | <2.3    | <1.0    | <1.0    | <2.0    | <2.0    | 3.4±0.0 | ND | ND |
| Kiwi<br>( <i>Actinidia<br/>deliciosa</i> )           | NP | <1.0    | <2.3    | 3.7±1.0  | 5.4±0.2 | <2.3    | <1.0    | <1.0    | <2.0    | <2.0    | 3.7±0.1 | ND | ND |
| Lettuce<br>( <i>Lactuca<br/>sativa</i> )             | HP | 3.5±0.7 | 3.5±0.4 | 4.1±1.0  | 7.3±0.5 | 3.5±0.0 | <1.0    | 6.0±0.0 | 2.8±0.0 | 2.2±0.0 | >6.0    | ND | ND |
| Tomato<br>( <i>Solanum<br/>lycopersicum</i> )        | DB | <1.0    | <2.3    | 2.3±0.1  | 4.7±0.3 | <2.3    | <1.0    | 3.3±0.1 | <2.0    | <2.0    | 4.2±0.1 | ND | ND |
|                                                      | MP | <1.0    | <2.3    | <2.3     | <2.3    | <2.3    | <1.0    | <1.0    | <2.0    | <2.0    | <1.0    | ND | ND |
|                                                      | PB | <1.0    | <2.3    | <2.3     | 5.8±0.2 | <2.3    | <1.0    | 5.4±0.1 | <2.0    | <2.0    | >6.0    | ND | ND |

**Table S7**

Microbiological assessment of the soil. Enumeration results were expressed in [log (CFU/g)] (ND means that the parameter was not detected in the sample).

| Farmer ID | Microbiological parameters |                      |                  |                         |                    |                       |                        |              |
|-----------|----------------------------|----------------------|------------------|-------------------------|--------------------|-----------------------|------------------------|--------------|
|           | <i>E. coli</i>             | <i>Listeria</i> spp. | <i>B. cereus</i> | <i>Pseudomonas</i> spp. | Coagulase-positive | <i>C. perfringens</i> | Detection of <i>L.</i> | Detection of |

|    |         |         |         |         | Staphylococci |         | <i>monocytogenes</i> | <i>Salmonella</i> spp. |
|----|---------|---------|---------|---------|---------------|---------|----------------------|------------------------|
| AB | 3.7±0.6 | 4.9±0.5 | 5.2±0.5 | 5.9±0.1 | 4.1±0.5       | 3.2±0.0 | ND                   | ND                     |
| BB | <1.0    | 4.0±0.2 | 3.7±1.2 | 5.3±0.0 | 3.4±0.2       | 3.7±0.1 | ND                   | ND                     |
| CB | <1.0    | 4.9±0.3 | 4.5±1.0 | 2.9±1.0 | 3.8±0.6       | 2.9±0.1 | ND                   | ND                     |
| DB | <1.0    | 5.0±0.2 | 4.3±0.8 | 4.6±0.9 | 3.8±0.2       | 4.2±0.0 | ND                   | ND                     |
| EB | 3.4±0.2 | 4.7±0.2 | 5.4±0.2 | 5.8±0.1 | 2.7±0.3       | 2.7±0.2 | ND                   | ND                     |
| FP | 3.2±0.1 | 4.9±0.2 | <2.3    | 5.7±0.0 | 4.0±0.2       | 2.0±0.0 | ND                   | ND                     |
| GP | 2.9±0.0 | 4.2±0.1 | 4.8±2.2 | 5.9±0.1 | 2.9±0.5       | 2.8±0.0 | ND                   | ND                     |
| HP | 3.6±0.3 | 4.6±0.6 | 3.5±0.3 | 6.0±0.0 | 2.7±0.2       | 3.2±0.0 | ND                   | ND                     |
| IP | <1.0    | 3.9±1.1 | 3.2±0.6 | 5.5±0.5 | 3.6±0.1       | 2.0±0.0 | ND                   | ND                     |
| JB | <1.0    | 4.7±0.1 | 5.5±0.1 | 5.7±0.1 | 2.6±0.1       | 2.2±0.0 | ND                   | ND                     |
| KP | <1.0    | 5.0±0.0 | 5.3±0.1 | 5.7±0.2 | 3.1±0.5       | 3.9±0.1 | ND                   | ND                     |
| LP | <1.0    | 4.7±0.0 | 5.2±0.3 | 5.8±0.1 | 2.4±0.1       | 3.1±0.1 | ND                   | ND                     |
| MP | <1.0    | 4.9±0.0 | 3.5±0.8 | 5.9±0.1 | 2.3±0.0       | 2.6±0.2 | ND                   | ND                     |
| NP | 5.4±0.1 | 4.4±0.1 | 5.1±0.2 | 5.5±0.1 | 2.4±0.1       | 2.3±0.1 | ND                   | ND                     |
| OP | 4.7±0.1 | 4.9±0.1 | 5.5±0.3 | 5.7±0.1 | 3.3±0.1       | 2.7±0.0 | ND                   | ND                     |
| PB | 3.2±0.3 | 4.7±0.1 | 5.3±0.0 | 5.9±0.1 | 3.8±0.2       | 3.7±0.1 | ND                   | ND                     |
| QB | 2.9±0.0 | 4.5±0.3 | 5.7±0.2 | 5.8±0.2 | 2.8±0.0       | 3.0±0.1 | ND                   | ND                     |

**Table S8**

Microbiological assessment of the irrigation water. Enumeration results were expressed in [log (CFU/100 mL)] (ND means that the parameter was not detected in the sample and D means that the parameter was detected in the sample).

| Farmer ID | Microbiological parameters |                              |                  |                            |                                         |                       |                           |         |         |                                   |                                      |                                              |
|-----------|----------------------------|------------------------------|------------------|----------------------------|-----------------------------------------|-----------------------|---------------------------|---------|---------|-----------------------------------|--------------------------------------|----------------------------------------------|
|           | <i>E. coli</i><br>[log     | <i>Listeria</i> spp.<br>[log | <i>B. cereus</i> | <i>Pseudomonas</i><br>spp. | Coagulase-<br>positive<br>Staphylococci | <i>C. perfringens</i> | <i>Enterobacteriaceae</i> | Yeasts  | Molds   | Aerobic<br>mesophilic<br>bacteria | Detection of <i>L. monocytogenes</i> | Detection<br>of<br><i>Salmonella</i><br>spp. |
| AB        | <0.0                       | >2.0                         | >2.0             | >2.0                       | <0.0                                    | 1.9±0.1               | 1.8±0.1                   | <0.0    | <0.0    | >2.0                              | ND                                   | ND                                           |
| BB        | <0.0                       | <0.0                         | 2.0±0.0          | >2.0                       | <0.0                                    | 1.2±0.2               | <0.00                     | <0.0    | 1.4±0.0 | 0.6±0.0                           | ND                                   | ND                                           |
| CB        | <0.0                       | 0.6±0.0                      | 2.2±0.1          | >2.0                       | <0.0                                    | <0.0                  | <0.00                     | 0.9±0.0 | 0.6±0.0 | 1.1±0.1                           | ND                                   | ND                                           |
| DB        | <0.0                       | 0.4±0.1                      | 0.9±0.1          | >2.0                       | <0.0                                    | 0.4±0.5               | 0.1±0.1                   | <0.0    | 1.4±0.0 | 0.9±0.0                           | ND                                   | ND                                           |
| EB        | <0.0                       | <0.0                         | 0.4±0.3          | 1.8±0.0                    | <0.0                                    | 0.2±0.2               | <0.0                      | <0.0    | 1.2±0.1 | >2.0                              | ND                                   | ND                                           |
| FP        | <0.0                       | <0.0                         | 0.9±0.4          | 1.6±0.0                    | <0.0                                    | 0.4±0.4               | <0.0                      | <0.0    | <0.0    | 1.9±0.0                           | <b>D</b>                             | ND                                           |
| GP        | 1.5±0.1                    | <0.0                         | 1.9±0.1          | >2.0                       | <0.0                                    | 1.9±0.1               | 1.7±0.0                   | <0.0    | 2.0±0.0 | 1.9±0.0                           | <b>D</b>                             | ND                                           |
| HP        | 0.6±0.3                    | <0.0                         | 0.8±0.1          | >2.0                       | <0.0                                    | 1.8±0.2               | 1.2±0.0                   | <0.0    | 1.7±0.0 | >2.0                              | ND                                   | ND                                           |
| IP        | <0.0                       | <0.0                         | 0.3±0.2          | 1.7±0.0                    | <0.0                                    | <0.0                  | <0.0                      | <0.0    | 0.9±0.0 | 0.6±0.0                           | ND                                   | ND                                           |
| JB        | 0.3±0.3                    | >2.0                         | 0.4±0.3          | >2.0                       | <0.0                                    | >2.0                  | 0.9±0.0                   | >2.0    | <0.0    | 1.4±0.0                           | ND                                   | ND                                           |
| KP        | <0.0                       | <0.0                         | >2.0             | >2.0                       | <0.0                                    | <0.0                  | <0.0                      | 1.3±0.0 | 1.4±0.1 | 1.5±0.2                           | ND                                   | ND                                           |
| LP        | <0.0                       | 1.60±0.0                     | <0.0             | >2.0                       | <0.0                                    | 0.1±0.1               | <0.0                      | <0.0    | 0.6±0.1 | >2.0                              | ND                                   | ND                                           |
| MP        | <0.0                       | <0.0                         | >2.0             | >2.0                       | <0.0                                    | 1.2±0.2               | <0.0                      | 1.7±0.1 | 1.7±0.1 | 1.9±0.1                           | ND                                   | ND                                           |
| NP        | <0.0                       | <0.0                         | >2.0             | 1.9±0.3                    | <0.0                                    | 1.4±0.0               | <0.0                      | <0.0    | 1.3±0.1 | 1.5±0.0                           | ND                                   | ND                                           |
| OP        | 0.8±0.2                    | 0.9±0.3                      | >2.0             | >2.0                       | <0.0                                    | 1.6±0.0               | 1.3±0.0                   | <0.0    | <0.0    | >2.0                              | ND                                   | ND                                           |
| PB        | <0.0                       | >2.0                         | >2.0             | >2.0                       | <0.0                                    | 1.2±0.1               | <0.0                      | 0.6±0.1 | 1.6±0.0 | 1.7±0.1                           | ND                                   | ND                                           |
| QB        | <0.0                       | >2.0                         | >2.0             | >2.0                       | >2.0                                    | >2.0                  | <0.0                      | <0.0    | 0.6±0.0 | >2.0                              | ND                                   | ND                                           |

**Table S9**

Pesticide, PCBs and flame retardants concentrations found in farmers food. Concentration results expressed in µg/kg. Results above de LOQ are in bold.

| Type of food sample                    | Farmer ID | Pesticide active compound | Results                     | MRLs | European regulation | Flame retardants /POP compound | Results                     |
|----------------------------------------|-----------|---------------------------|-----------------------------|------|---------------------|--------------------------------|-----------------------------|
| Apple ( <i>Malus domestica</i> )       | BB        | Aldrin                    | 0.10±0.02 (< LOD)           | 10   | Reg. (EC) 839/2008  | TBEP                           | <b>6.46±0.19 (&gt; LOQ)</b> |
|                                        |           | Cypermethrin              | 0.14±0.00 (< LOD)           | 10   | Reg. (EU) 2017/626  | TCP I                          | 0.14±0.00 (< LOD)           |
|                                        |           | Deltamethrin I            | 0.15±0.02 (< LOD)           | 200  | Reg. (EU) 2018/832  |                                |                             |
|                                        | GP        | Chlorpyrifos              | <b>0.13±0.00 (&gt; LOQ)</b> | 10   | Reg. (EU) 2020/1085 | TBEP                           | <b>7.54±0.76 (&gt; LOQ)</b> |
|                                        |           | p,p'-DDD                  | <b>0.34±0.08 (&gt; LOQ)</b> | 50   | Reg. (EU) 2023/163  | TCP I                          | 0.11±0.00 (< LOD)           |
| Bell pepper ( <i>Capsicum annuum</i> ) | CB        | Chlorfenvinphos           | 0.10±0.0 (< LOD)            | 10   | Reg. (EU) 1138/2013 | TBEP                           | <b>6.29±0.69 (&gt; LOQ)</b> |
|                                        |           | Chlorpyrifos              | <b>0.14±0.01 (&gt; LOQ)</b> | 10   | Reg. (EU) 2020/1085 | TCP I                          | 0.38 ±0.25 (< LOQ)          |
|                                        |           | Chlorpyrifos-methyl       | 0.24±0.00 (< LOQ)           | 10   | Reg. (EU) 2020/1085 | TCP II                         | 0.10±0.00 (< LOD)           |
|                                        |           | p,p'-DDD                  | 0.27±0.00 (< LOQ)           | 50   | Reg. (EU) 2023/163  | TEHP                           | <b>0.90±0.00(&gt; LOQ)</b>  |
|                                        |           | Dimethoate                | 0.20±0.00 (< LOQ)           | 10   | Reg. (EU) 2021/155  |                                |                             |
|                                        | EB        | ---                       | ---                         | ---  | ---                 | TBEP                           | <b>6.58±0.99 (&gt; LOQ)</b> |
|                                        |           |                           |                             |      |                     | TCP I                          | 0.19±0.00 (< LOD)           |
|                                        | IP        | Chlorpyrifos              | <b>0.14±0.02 (&gt; LOQ)</b> | 10   | Reg. (EU) 2020/1085 | TBEP                           | <b>5.89±0.75 (&gt; LOQ)</b> |
|                                        |           | Dimethoate                | 0.19±0.00 (< LOQ)           | 10   | Reg. (EU) 2021/155  |                                |                             |
|                                        | JB        | Chlorpyrifos              | <b>0.13±0.00 (&gt; LOQ)</b> | 10   | Reg. (EU) 2020/1085 | TBEP                           | <b>6.37±0.66 (&gt; LOQ)</b> |
|                                        |           | p,p'-DDD                  | <b>0.58±0.00 (&gt; LOQ)</b> | 50   | Reg. (EU) 2023/163  | TCP I                          | 0.13±0.00 (< LOD)           |
|                                        |           | Dimethoate                | 0.19±0.00 (< LOQ)           | 10   | Reg. (EU) 2021/155  |                                |                             |

|                                               |    |                     |                             |     |                     |         |                             |
|-----------------------------------------------|----|---------------------|-----------------------------|-----|---------------------|---------|-----------------------------|
|                                               | QB | p,p'-DDD            | 0.17±0.01 (< LOQ)           | 50  | Reg. (EU) 2023/163  | TBEP    | <b>6.86±0.66 (&gt; LOQ)</b> |
| Bok choy ( <i>Brassica rapa</i> )             | KP | ---                 | ---                         | --- | ---                 | TBEP    | <b>6.93±0.47 (&gt; LOQ)</b> |
| Carrots ( <i>Daucus carota</i> )              | LP | Bifenthrin          | <b>3.12±1.53 (&gt; LOQ)</b> | 50  | Reg. (EU) 2018/687  | PCB153  | 1.16±0.00 (< LOQ)           |
|                                               |    | p,p'-DDD            | 0.19±0.02 (< LOQ)           | 50  | Reg. (EU) 2023/163  | TBEP    | <b>6.37±0.33 (&gt; LOQ)</b> |
|                                               |    | Dieldrin            | 0.26±0.01 (< LOD)           | 10  | Reg. (EU) 2015/399  | TCPI    | 0.27±0.00 (< LOQ)           |
| Chard for raw salads ( <i>Beta vulgaris</i> ) | OP | ---                 | ---                         | --- | ---                 | TEHP    | <b>0.87±0.00 (&gt; LOQ)</b> |
|                                               |    |                     |                             |     |                     | TBEP    | <b>7.99±1.04 (&gt; LOQ)</b> |
|                                               |    |                     |                             |     |                     | TCP I   | 0.42±0.00 (< LOQ)           |
| Cucumber ( <i>Cucumis sativus</i> )           | AB | Chlorpyrifos-methyl | 0.25±0.00 (< LOQ)           | 10  | Reg. (EU) 2020/1085 | TBEP    | <b>7.29±0.84 (&gt; LOQ)</b> |
|                                               |    | p,p'-DDD            | 0.44±0.06 (< LOQ)           | 50  | Reg. (EU) 2023/163  | TCP I   | 0.10±0.00 (< LOD)           |
|                                               |    |                     |                             |     |                     | TCP III | 0.16±0.00 (< LOD)           |
|                                               | FP | Chlorpyrifos        | <b>0.13±0.00 (&gt; LOQ)</b> | 10  | Reg. (EU) 2020/1085 | TBEP    | <b>5.81±3.09 (&gt; LOQ)</b> |
|                                               |    | p,p'-DDD            | <b>0.89±0.00 (&gt; LOQ)</b> | 50  | Reg. (EU) 2023/163  | TEHP    | <b>0.91±0.00 (&gt; LOQ)</b> |
| Kiwi ( <i>Actinidia deliciosa</i> )           | NP | Chlorpyrifos-methyl | 0.24±0.00 (< LOQ)           | 10  | Reg. (EU) 2020/1085 | TBEP    | <b>7.47±0.95 (&gt; LOQ)</b> |
|                                               |    | p,p'-DDD            | 0.50±0.21 (< LOQ)           | 50  | Reg. (EU) 2023/163  |         |                             |
| Lettuce ( <i>Lactuca sativa</i> )             | HP | Chlorpyrifos        | <b>0.13±0.00 (&gt; LOQ)</b> | 10  | Reg. (EU) 2020/1085 | TBEP    | <b>6.64±0.00 (&gt; LOQ)</b> |
|                                               |    | Dieldrin            | 0.24±0.00 (< LOD)           | 10  | Reg. (EC) 839/2008  |         |                             |
|                                               |    |                     |                             |     |                     | TEHP    | <b>0.85±0.00 (&gt; LOQ)</b> |
| Tomato ( <i>Solanum lycopersicum</i> )        | DB | p,p'-DDD            | 0.18±0.02 (< LOQ)           | 50  | Reg. (EU) 2023/163  | TBEP    | <b>8.15±0.76 (&gt; LOQ)</b> |
|                                               |    | Dieldrin            | 0.23±0.00 (< LOD)           | 10  | Reg. (EC) 839/2008  |         |                             |
|                                               | MP | ---                 | ---                         | --- | ---                 | TBEP    | <b>5.42±0.12 (&gt; LOQ)</b> |
|                                               |    |                     |                             |     |                     | TCP I   | 0.16±0.00 (< LOD)           |

|    |            |                             |    |                    |       |                             |
|----|------------|-----------------------------|----|--------------------|-------|-----------------------------|
| PB | p,p'-DDD   | <b>0.71±0.00 (&gt; LOQ)</b> | 50 | Reg. (EU) 2023/163 | TBEP  | <b>5.79±1.17 (&gt; LOQ)</b> |
|    | Dimethoate | 0.19±0.00 (< LOQ)           | 10 | Reg. (EU) 2021/155 | TCP I | 0.11±0.00 (< LOD)           |

**Table S10**

Pesticide, PCBs and flame retardants concentrations found in farmer's soil. Concentration results expressed in µg/kg. Results above de LOQ are in bold.

| Farmer ID | Agrochemical active compound | Results                       | Maximum limit                    | Flame retardants/POP compound | Results                     |
|-----------|------------------------------|-------------------------------|----------------------------------|-------------------------------|-----------------------------|
| AB        | Chlorpyrifos                 | <b>0.15±0.02 (&gt; LOQ)</b>   |                                  | TBEP                          | <b>6.52±0.47 (&gt; LOQ)</b> |
|           | p,p'-DDD                     | <b>1.09 ±0.00 (&gt; LOQ)</b>  | 100 <sup>a</sup>                 | TCP I                         | 0.32±0.24 (< LOQ)           |
| BB        | Chlorpyrifos-methyl          | 0.14±0.15 (< LOQ)             |                                  | TBEP                          | <b>5.19±0.57 (&gt; LOQ)</b> |
|           | p,p'-DDD                     | <b>0.70±0.48 (&gt; LOQ)</b>   | 100 <sup>a</sup>                 |                               |                             |
|           | Dieldrin                     | 0.25±0.00 (< LOD)             | 50 <sup>a</sup>                  |                               |                             |
|           | Dimethoate                   | 0.19±0.00 (< LOQ)             |                                  |                               |                             |
|           | Endosulfan I                 | <b>1.59±0.00 (&gt; LOQ)</b>   | 10 <sup>a</sup> /40 <sup>b</sup> |                               |                             |
| CB        | Aldrin                       | <b>10.26 ±0.78 (&gt; LOQ)</b> | 50 <sup>a</sup>                  | TBEP                          | <b>6.00±0.57 (&gt; LOQ)</b> |
|           | Chlorpyrifos                 | <b>0.31±0.03 (&gt; LOQ)</b>   |                                  | TCP I                         | 0.13±0.04 (< LOD)           |
|           | Chlorpyrifos-methyl          | 0.24 ±0.00 (< LOQ)            |                                  | TCP II                        | 0.36±0.16 (< LOD)           |
|           | Dimethoate                   | 0.19±0.00 (< LOQ)             |                                  |                               |                             |
| DB        | Chlorpyrifos                 | <b>0.13±0.01 (&gt; LOQ)</b>   |                                  | TBEP                          | <b>7.46±0.70 (&gt; LOQ)</b> |
|           | p,p'-DDD                     | 0.50±0.30 (< LOQ)             | 100 <sup>a</sup>                 |                               |                             |
|           | Dimethoate                   | 0.19±0.00 (< LOQ)             |                                  |                               |                             |
| EB        | Chlorpyrifos-methyl          | 0.24±0.00 (< LOQ)             |                                  | TBEP                          | <b>5.32±0.66 (&gt; LOQ)</b> |

|    |                     |                             |                  |        |                             |
|----|---------------------|-----------------------------|------------------|--------|-----------------------------|
| FP | ---                 | ---                         | ---              | TCP I  | 0.24±0.00 (< LOD)           |
|    |                     |                             |                  | TBEP   | <b>7.07±0.01 (&gt; LOQ)</b> |
|    |                     |                             |                  | PCB180 | 0.35±0.00 (< LOD)           |
| GP | Chlorpyrifos        | <b>0.13±0.00 (&gt; LOQ)</b> |                  | TBEP   | <b>6.96±0.80 (&gt; LOQ)</b> |
|    |                     |                             |                  | TCP I  | <b>0.96±0.43 (&gt; LOQ)</b> |
| HP | ---                 | ---                         |                  | TBEP   | <b>6.84±0.99 (&gt; LOQ)</b> |
| IP | Chlorpyrifos        | <b>0.66±0.46 (&gt; LOQ)</b> |                  | TBEP   | <b>4.64±3.67 (&gt; LOQ)</b> |
|    | Chlorpyrifos-methyl | 0.25±0.00 (< LOQ)           |                  |        |                             |
|    | p,p'-DDD            | 0.52±0.15 (< LOQ)           | 100 <sup>a</sup> |        |                             |
|    | Dimethoate          | 0.19±0.00 (< LOQ)           |                  |        |                             |
| JB | Chlorpyrifos        | <b>0.13±0.00 (&gt; LOQ)</b> |                  | TBEP   | <b>7.67±1.15 (&gt; LOQ)</b> |
|    | p,p'-DDD            | 0.31±0.16 (< LOQ)           | 100 <sup>a</sup> | TCP I  | 0.12±0.02 (< LOD)           |
| KP | Aldrin              | 1.25±0.85 (< LOQ)           | 50 <sup>a</sup>  | TBEP   | 6.39±0.49 (> LOQ)           |
|    | Chlorpyrifos        | <b>0.13±0.00 (&gt; LOQ)</b> |                  | TCP I  | 0.28±0.00 (< LOQ)           |
|    |                     |                             |                  | TnBP   | <b>0.85±0.00 (&gt; LOQ)</b> |
| LP | Chlorpyrifos        | <b>0.13±0.00 (&gt; LOQ)</b> |                  | TBEP   | <b>4.19±0.72 (&gt; LOQ)</b> |
|    | Cyhalothrin II      | 0.59±0.00 (< LOQ)           |                  |        |                             |
|    | p,p'-DDD            | 0.44±0.21 (< LOQ)           | 100 <sup>a</sup> |        |                             |
| MP | p,p'-DDD            | 0.51±0.53 (< LOQ)           | 100 <sup>a</sup> | TBEP   | <b>5.09±0.57 (&gt; LOQ)</b> |
|    |                     |                             |                  | TCP I  | 0.43±0.00 (< LOQ)           |
| NP | Cholfenvinphos      | 0.12±0.00 (< LOD)           |                  | TBEP   | <b>6.17±0.71 (&gt; LOQ)</b> |
|    | p,p'-DDD            | <b>0.68±0.38 (&gt; LOQ)</b> | 100 <sup>a</sup> |        |                             |
|    | p,p'-DDE            | 0.12±0.00 (< LOD)           | 100 <sup>a</sup> |        |                             |

|    |              |                             |                  |        |                             |
|----|--------------|-----------------------------|------------------|--------|-----------------------------|
| OP | Chlorpyrifos | <b>2.81±3.41 (&gt; LOQ)</b> |                  | TBEP   | <b>5.85±0.63 (&gt; LOQ)</b> |
|    | p,p'-DDD     | 0.47±0.48 (< LOQ)           | 100 <sup>a</sup> | TCP II | 0.11±0.00 (< LOD)           |
| PB | Chlorpyrifos | <b>0.13±0.00 (&gt; LOQ)</b> |                  | TBEP   | <b>7.30±0.51 (&gt; LOQ)</b> |
|    | p,p'-DDD     | 0.17±0.00 (< LOQ)           | 100 <sup>a</sup> | TCP I  | 0.21±0.00 (< LOD)           |
| QB | Chlorpyrifos | 0.12±0.00 (= LOQ)           |                  | TBEP   | <b>7.45±1.45 (&gt; LOQ)</b> |

<sup>a</sup> Reference values from Ministry of the Environment, Finland. Government Decree on the Assessment of Soil Contamination and Remediation Needs (214/2007)

<sup>b</sup> Reference values from APA, 2022

**Table S11**

Pesticide, PCBs and flame retardants concentrations found in farmers irrigation water. Concentration results expressed in µg/L. Results equals and above the LOQ are in bold.

| Farmer ID | Agrochemical active compound | LOD (fd 250x) | LOQ (fd 250x) | Results                       | Flame retardants/POP compound | LOD (fd 250x) | LOQ (fd 250x) | Results |
|-----------|------------------------------|---------------|---------------|-------------------------------|-------------------------------|---------------|---------------|---------|
| AB        | Chlorpyrifos                 | 0.005         | 0.016         | <b>0.020±0.289 (&gt; LOQ)</b> | --                            | --            | --            | --      |
|           | Chlorpyrifos-methyl          | 0.015         | 0.049         | 0.032±0.000 (<LOQ)            |                               |               |               |         |
| BB        | Chlorpyrifos                 | 0.005         | 0.016         | <b>0.017±0.016 (&gt; LOQ)</b> | --                            | --            | --            | --      |
|           | Chlorpyrifos-methyl          | 0.015         | 0.049         | 0.032±0.000 (<LOQ)            |                               |               |               |         |
| CB        | Chlorpyrifos-methyl          | 0.015         | 0.049         | 0.032±0.000 (<LOQ)            | --                            | --            | --            | --      |
|           | p,p'-DDD                     | 0.021         | 0.070         | 0.028±0.010 (<LOQ)            |                               |               |               |         |
| EB        | Dimethoate                   | 0.022         | 0.075         | 0.026±0.000 (<LOQ)            | --                            | --            | --            | --      |
| GP        | Chlorpyrifos                 | 0.005         | 0.016         | <b>0.017±0.000 (&gt; LOQ)</b> | --                            | --            | --            | --      |
|           | p,p'-DDD                     | 0.021         | 0.070         | 0.028±0.000 (<LOQ)            |                               |               |               |         |
| HP        | Chlorpyrifos-methyl          | 0.015         | 0.049         | 0.032±0.000 (<LOQ)            | --                            | --            | --            | --      |
| JB        | Bifentrin                    | 0.037         | 0.122         | <b>0.407±1.937 (&gt; LOQ)</b> | --                            | --            | --            | --      |

|    |                    |       |       |                               |         |       |       |                               |
|----|--------------------|-------|-------|-------------------------------|---------|-------|-------|-------------------------------|
| KP | Bifentrin          | 0.037 | 0.122 | <b>0.213±0.000 (&gt; LOQ)</b> | --      |       |       | --                            |
|    | Chorpyrifos        | 0.005 | 0.016 | <b>0.016±0.000 (&gt; LOQ)</b> |         |       |       |                               |
| LP | Chorpyrifos        | 0.005 | 0.016 | <b>0.016±0.000 (&gt; LOQ)</b> | TCP III | 0.064 | 0.213 | <b>0.467±0.000 (&gt; LOQ)</b> |
|    | Chorpyrifos-methyl | 0.015 | 0.049 | 0.032±0.000 (<LOQ)            |         |       |       |                               |
| NP | Chorpyrifos        | 0.005 | 0.016 | <b>0.018±0.000 (&gt; LOQ)</b> | --      |       |       | --                            |
| OP | --                 | --    | --    | --                            | TCP III | 0.064 | 0.213 | <b>2.601±0.000 (&gt; LOQ)</b> |
| PB | p,p'-DDD           | 0.021 | 0.070 | 0.034±0.000 (<LOQ)            | --      | --    | --    | --                            |
| QB | Chorpyrifos-methyl | 0.015 | 0.049 | 0.034±0.000 (<LOQ)            | --      | --    | --    | --                            |

**Table S12**

Nitrate concentrations found in farmers food, soil and water. Results above the established limits are in bold.

| Type of food sample                           | Farmer ID | Food (mg/kg)    | Soil (mg/kg)    | Water (mg/L) |
|-----------------------------------------------|-----------|-----------------|-----------------|--------------|
| Apple ( <i>Malus domestica</i> )              | BB        | 11±3            | <b>64±10</b>    | <b>52±10</b> |
|                                               | GP        | 16±1            | <b>55±6</b>     | 13±4         |
| Bell pepper ( <i>Capsicum annuum</i> )        | CB        | 23±6            | <b>3084±234</b> | 5±0          |
|                                               | EB        | 45±13           | <b>79±14</b>    | 1±0 (< LOQ)  |
|                                               | IP        | 11±4            | <b>200±32</b>   | 46±13        |
|                                               | JB        | 43±10           | <b>214±21</b>   | <b>76±17</b> |
|                                               | QB        | 17±4            | <b>97±13</b>    | 4±2          |
|                                               | KP        | <b>1079±100</b> | <b>268±32</b>   | --           |
| Bok choy ( <i>Brassica rapa</i> )             |           |                 |                 |              |
| Carrots ( <i>Daucus carota</i> )              | LP        | <b>825±32</b>   | 50±11           | 13±6         |
| Chard for raw salads ( <i>Beta vulgaris</i> ) | OP        | <b>2599±164</b> | <b>1661±156</b> | --           |

|                                        |    |                 |                 |             |
|----------------------------------------|----|-----------------|-----------------|-------------|
| Cucumber ( <i>Cucumis sativus</i> )    | AB | 111±21          | <b>71±12</b>    | 5±1         |
|                                        | FP | 90±10           | <b>1421±146</b> | 12±5        |
| Kiwi ( <i>Actinidia deliciosa</i> )    | NP | 9±2             | <b>52±8</b>     | 1±0 (< LOQ) |
| Lettuce ( <i>Lactuca sativa</i> )      | HP | <b>1484±146</b> | <b>588±101</b>  | 11±3        |
| Tomato ( <i>Solanum lycopersicum</i> ) | DB | <b>124±15</b>   | <b>90±12</b>    | 30±6        |
|                                        | MP | 34±1            | <b>85±7</b>     | --          |
|                                        | PB | <b>100±26</b>   | 48±4            | 2±0         |

**Table S13**

Heavy metals found in farmers food in mg/kg of fresh weight. Results above the LOQ are in bold.

| Type of sample                                | Farmer ID | Zn                 | Cd                 | Pb                 | Ni                  | Cu                 | Cr                 | Hg |
|-----------------------------------------------|-----------|--------------------|--------------------|--------------------|---------------------|--------------------|--------------------|----|
| Apple ( <i>Malus domestica</i> )              | BB        | 1.842±0.521 (<LOQ) | 0.019±0.003 (<LOQ) | 0.045±0.022 (<LOQ) | --                  | <b>1.506±0.621</b> | 0.010±0.004 (<LOD) | -- |
|                                               | GP        | 0.180±0.061 (<LOD) | 0.024±0.010 (<LOQ) | 0.040±0.012 (<LOD) | 0.014±0.007 (<LOD)  | 0.179±0.043 (<LOD) | 0.015±0.004 (<LOD) | -- |
| Bell pepper ( <i>Capsicum annuum</i> )        | CB        | 1.956±0.201 (<LOQ) | <b>0.023±0.009</b> | 0.016±0.006 (<LOD) | 0.009±0.002 (<LOD)  | <b>0.961±0.092</b> | 0.010±0.000 (<LOD) | -- |
|                                               | EB        | 1.461±0.312 (<LOQ) | <b>0.017±0.005</b> | 0.037±0.014 (<LOQ) | 0.004±0.000 (<LOD)  | <b>0.729±0.027</b> | 0.018 ±0.006(<LOD) | -- |
|                                               | IP        | 1.475±0.256 (<LOD) | 0.008±0.002 (<LOD) | 0.024±0.007 (<LOQ) | 0.024±0.010 (<LOQ)  | <b>0.692±0.143</b> | 0.007±0.003 (<LOD) | -- |
|                                               | JB        | 1.028±0.712 (<LOQ) | 0.008±0.003 (<LOQ) | 0.013±0.005 (<LOD) | <b>0.024±0.015</b>  | <b>0.567±0.076</b> | 0.014±0.006 (<LOD) | -- |
|                                               | QB        | 2.269±0.731 (<LOQ) | <b>0.019±0.011</b> | 0.012±0.005 (<LOD) | 0.020 (<LOQ) ±0.011 | <b>0.993±0.134</b> | 0.022±0.011 (<LOD) | -- |
| Bok choy ( <i>Brassica rapa</i> )             | KP        | <b>5.422±1.054</b> | <b>0.027±0.006</b> | <b>0.093±0.025</b> | <b>0.051±0.010</b>  | 0.286±0.065 (<LOQ) | 0.182±0.071 (<LOD) | -- |
| Carrots ( <i>Daucus carota</i> )              | LP        | <b>6.529±1.328</b> | <b>0.054±0.015</b> | <b>0.156±0.043</b> | <b>0.069±0.035</b>  | <b>0.966±0.365</b> | 0.104±0.052 (LOQ)  | -- |
| Chard for raw salads ( <i>Beta vulgaris</i> ) | OP        | <b>4.608±1.612</b> | <b>0.084±0.032</b> | <b>0.450±0.126</b> | <b>0.278±0.127</b>  | 1.507±0.719 (<LOD) | <b>1.762±0.582</b> | -- |

|                                        |    |                    |                    |                    |                    |                    |                    |    |
|----------------------------------------|----|--------------------|--------------------|--------------------|--------------------|--------------------|--------------------|----|
| Cucumber ( <i>Cucumis sativus</i> )    | AB | <b>1.699±0.412</b> | 0.006±0.000 (<LOQ) | 0.015±0.003 (<LOQ) | 0.017±0.009 (<LOQ) | <b>0.313±0.062</b> | 0.006±0.002 (<LOD) | -- |
|                                        | FP | <b>2.179±0.841</b> | 0.010±0.006 (<LOQ) | 0.017±0.006 (<LOD) | 0.013±0.004 (<LOQ) | <b>0.341±0.067</b> | 0.008±0.004 (<LOD) | -- |
| Kiwi ( <i>Actinidia deliciosa</i> )    | NP | 1.276±0.775 (<LOD) | 0.023±0.011 (<LOQ) | 0.028±0.010 (<LOD) | 0.062±0.020 (<LOQ) | <b>1.523±0.347</b> | --                 | -- |
| Lettuce ( <i>Lactuca sativa</i> )      | HP | <b>5.860±2.634</b> | 0.060±0.032 (<LOQ) | 0.033±0.015 (<LOQ) | 0.042±0.026 (<LOQ) | <b>0.752±0.111</b> | 0.051±0.016 (<LOD) | -- |
| Tomato ( <i>Solanum lycopersicum</i> ) | DB | <b>2.743±0.859</b> | <b>0.015±0.009</b> | 0.023±0.011 (<LOD) | --                 | <b>0.545±0.120</b> | 0.007±0.004 (<LOD) | -- |
|                                        | MP | 1.371±0.923 (<LOQ) | <b>0.026±0.015</b> | 0.029±0.006 (<LOQ) | 0.001±0.000 (<LOD) | <b>0.425±0.116</b> | 0.011±0.005 (<LOD) | -- |
|                                        | PB | 1.642±0.428 (<LOQ) | <b>0.017±0.008</b> | 0.011±0.005 (<LOD) | 0.010±0.005 (<LOQ) | <b>0.547±0.256</b> | 0.006±0.001 (<LOD) | -- |

**Table S14**

Heavy metals found in farmers' soil (mg/kg dry weight). Results equals and above the LOQ are in bold.

| Farmers' ID | Zn                | Cd               | Pb                 | Ni                | Cu                | Cr                | Hg |
|-------------|-------------------|------------------|--------------------|-------------------|-------------------|-------------------|----|
| AB          | 22.85±1.24 (<LOQ) | <b>0.61±0.25</b> | <b>2.88±0.46</b>   | <b>4.56±3.12</b>  | <b>35.85±3.00</b> | <b>34.94±2.33</b> | -- |
| BB          | --                | 0.17±0.08 (<LOQ) | 1.03±0.83 (<LOQ)   | --                | --                | --                | -- |
| CB          | 14.57±0.93 (<LOQ) | <b>0.35±0.12</b> | <b>5.10±3.46</b>   | <b>2.18±0.24</b>  | <b>29.95±4.00</b> | <b>19.03±5.54</b> | -- |
| DB          | 19.12±1.33 (<LOQ) | <b>0.43±0.18</b> | <b>4.56±2.82</b>   | <b>2.95±1.85</b>  | <b>30.19±1.42</b> | <b>22.12±0.38</b> | -- |
| EB          | 25.90±3.44 (<LOQ) | <b>0.33±0.17</b> | <b>4.48±3.15</b>   | <b>5.03±3.25</b>  | <b>24.58±1.38</b> | <b>30.53±1.62</b> | -- |
| FP          | <b>37.13±1.47</b> | <b>0.67±0.31</b> | <b>12.52±10.72</b> | <b>18.33±0.50</b> | <b>41.46±3.21</b> | <b>61.49±4.10</b> | -- |
| GP          | 18.35±2.79 (<LOQ) | <b>0.56±0.20</b> | <b>3.78±3.00</b>   | <b>4.29±1.57</b>  | <b>72.72±2.00</b> | <b>35.22±2.11</b> | -- |
| HP          | 23.12±0.47 (<LOQ) | <b>0.64±0.16</b> | <b>4.01±2.37</b>   | <b>8.36±3.78</b>  | <b>27.96±1.02</b> | <b>40.30±5.26</b> | -- |
| IP          | 18.00±1.77 (<LOQ) | <b>0.85±0.26</b> | <b>6.57±3.47</b>   | <b>3.66±2.48</b>  | <b>46.33±6.93</b> | <b>41.05±2.29</b> | -- |
| JB          | 15.10±4.00 (<LOQ) | <b>0.27±0.03</b> | <b>1.35±0.64</b>   | <b>3.37±0.15</b>  | <b>18.05±2.00</b> | <b>31.99±4.63</b> | -- |
| KP          | 10.24±4.33 (<LOD) | 0.13±0.08 (<LOQ) | <b>1.70±1.23</b>   | <b>2.26±0.92</b>  | 1.08±0.082 (<LOD) | <b>14.52±1.18</b> | -- |

|    |                   |                  |                  |                   |                   |                   |    |
|----|-------------------|------------------|------------------|-------------------|-------------------|-------------------|----|
| LP | --                | 0.08±0.05 (<LOQ) | 0.89±0.82 (<LOQ) | --                | --                | --                | -- |
| MP | 17.07±0.26 (<LOQ) | <b>0.22±0.14</b> | <b>2.68±1.85</b> | <b>2.74±2.10</b>  | <b>30.66±4.00</b> | <b>16.27±1.58</b> | -- |
| NP | 18.20±0.38 (<LOQ) | <b>0.92±0.52</b> | <b>8.06±2.53</b> | <b>10.19±1.85</b> | <b>21.00±2.46</b> | <b>58.97±2.50</b> | -- |
| OP | 26.62±0.67 (<LOQ) | <b>0.60±0.25</b> | <b>3.29±2.55</b> | <b>9.36±1.72</b>  | <b>44.78±3.73</b> | <b>63.02±1.56</b> | -- |
| PB | 34.76±0.67 (<LOQ) | 0.18±0.08 (<LOQ) | <b>4.66±2.37</b> | <b>2.71±1.92</b>  | <b>21.81±1.93</b> | <b>21.62±2.04</b> | -- |
| QB | 34.21±1.00 (<LOQ) | <b>0.61±0.48</b> | <b>5.79±4.90</b> | <b>7.49±1.53</b>  | <b>29.49±7.46</b> | <b>44.23±2.38</b> | -- |

**Table S15**

Heavy metals found in irrigation water (mg/L). Results above the LOQ are in bold.

| Farmers' ID | Zn                   | Cd                   | Pb                   | Ni                   | Cu                   | Cr                   | Hg |
|-------------|----------------------|----------------------|----------------------|----------------------|----------------------|----------------------|----|
| AB          | --                   | 0.0003±0.0004 (<LOD) | 0.0024±0.0008 (<LOD) | --                   | --                   | 0.0008±0.0003 (<LOD) | -- |
| BB          | 0.0280±0.014 (<LOD)  | --                   | --                   | --                   | --                   | --                   | -- |
| CB          | --                   | 0.0006±0.0010 (<LOD) | 0.0041±0.0021 (<LOQ) | --                   | --                   | 0.0007±0.0003 (<LOD) | -- |
| DB          | 0.0173±0.0045 (<LOD) | 0.0005±0.0001 (<LOD) | <b>0.0218±0.0073</b> | 0.0001±0.0000 (<LOD) | --                   | 0.0005±0.0003 (<LOD) | -- |
| EB          | <b>0.2503±0.0075</b> | 0.0007±0.0001 (<LOD) | 0.0027±0.0012 (<LOD) | 0.0037±0.0010 (<LOQ) | 0.0050±0.0021 (<LOD) | 0.0002±0.0000 (<LOD) | -- |
| FP          | --                   | 0.0003±0.005 (<LOD)  | 0.0040±0.0012 (<LOQ) | 0.0005±0.0003 (<LOD) | --                   | 0.0010±0.0007 (<LOD) | -- |
| GP          | --                   | 0.0003±0.0001 (<LOD) | 0.0009±0.0010 (<LOD) | --                   | --                   | --                   | -- |
| HP          | --                   | 0.0003±0.0001 (<LOD) | 0.0029±0.0016 (=LOD) | --                   | 0.0015±0.0009 (<LOD) | 0.0006±0.002 (<LOD)  | -- |
| IP          | --                   | 0.0004±0.005 (<LOD)  | 0.0022±0.0014 (<LOD) | --                   | --                   | --                   | -- |
| JB          | 0.0123±0.0054 (<LOD) | 0.0008±0.0003 (<LOQ) | 0.0043±0.0011 (<LOQ) | 0.0007±0.0001 (<LOD) | --                   | --                   | -- |
| KP          | --                   | 0.0004±0.0006 (<LOD) | 0.0029±0.0007 (=LOD) | 0.0017±0.0006 (<LOD) | --                   | --                   | -- |
| LP          | --                   | 0.0009±0.0006 (<LOD) | 0.0042±0.0010 (<LOQ) | --                   | --                   | 0.0002±0.0002 (<LOD) | -- |

|    |    |                      |                      |                       |                      |                      |    |
|----|----|----------------------|----------------------|-----------------------|----------------------|----------------------|----|
| MP | -- | 0.0005±0.0001 (<LOD) | 0.0025±0.0007 (<LOQ) | 0.0006±0.0003 (<LOD)  | --                   | 0.0004±0.0000 (<LOD) | -- |
| NP | -- | 0.0005±0.0002 (<LOD) | 0.0022±0.0006 (<LOD) | 0.0043±30.0015 (<LOQ) | --                   | 0.0009±0.0005 (<LOD) | -- |
| OP | -- | 0.0004±0.0002 (<LOD) | 0.0105±0.0090 (<LOQ) | --                    | --                   | 0.0007±0.0002 (<LOD) | -- |
| PB | -- | 0.0004±0.0001 (<LOD) | 0.0027±0.0005 (<LOD) | --                    | 0.0009±0.0012 (<LOD) | --                   | -- |
| QB | -- | 0.0005±0.0006 (<LOD) | 0.0013±0.0005 (<LOD) | 0.0005±0.0005 (<LOD)  | --                   | 0.0002±0.0000 (<LOD) | -- |

---
